# Supplementary material
Source: PubMed Central journal article supplement (PMC9728153)
Supplement: NIHMS1854189-supplement-Supplementary_Information.pdf [file NIHMS1854189-supplement-Supplementary_Information.pdf]

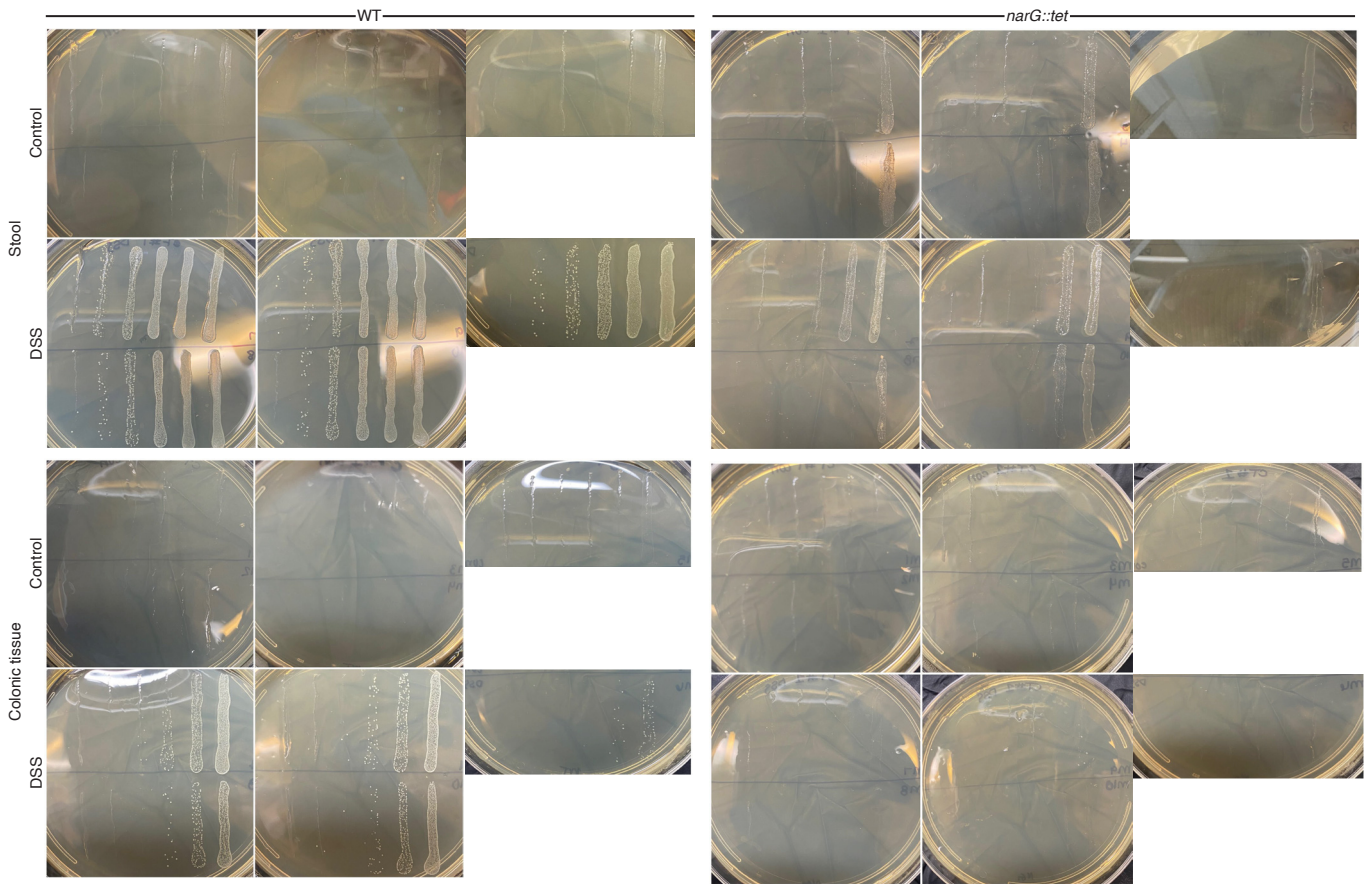

**Supplementary Figure 1. CFU enumeration on selective media of the *Veillonella* competition experiment in ASF mice, comparing the engraftment of WT and *narG::tet* strains.** Representative images of *Veillonella* colonies on selective media plates recovered on day 9 from the stool and colonic tissue of ASF mice in the competition experiment treated with and without DSS.

**Supplementary Table 1.** List of strains

| Strain  | Genotype                                                            | Reference/construction |
|---------|---------------------------------------------------------------------|------------------------|
| RJX3383 | SKV38 WT                                                            | Knapp et al. (2017)    |
| bAM04   | SKV38 <i>narK-chl-hemZ</i>                                          | This work              |
| RJX3411 | SKV38 <i>lldP::cm</i>                                               | This work              |
| RJX3393 | SKV38 <i>narG::tet</i>                                              | This work              |
| bAM06   | SKV38 <i>narI::chl</i>                                              | This work              |
| RJX3418 | SKV38 <i>opp1_operon::chl opp2_operon::tet<br/>opp3_operon::ery</i> | This work              |
| RJX3402 | SKV38 <i>optA::cm optB::tet</i>                                     | This work              |
| RJX3412 | SKV38 <i>atpBEFHAGDC::tet</i>                                       | This work              |
| RJX3413 | SKV38 <i>atpDC::chl</i>                                             | This work              |
| RJX3414 | SKV38 <i>atpC::chl</i>                                              | This work              |
| bAM08   | SKV38 <i>narI::chl recD2-Pnar<sub>RGHJI</sub>-narI (ery)-yhjX</i>   | This work              |
| RJX3589 | <i>Veillonella parvula</i> DSM2008                                  | Lab strain             |
| LD205   | <i>Veillonella dispar</i> LD205                                     | Lab strain             |
| RJX1392 | <i>Veillonella atypica</i> RJX1392                                  | Lab strain             |
| RJX1514 | <i>Veillonella atypica</i> RJX1514                                  | Lab strain             |
| RJX3299 | <i>Veillonella ratti</i> 84                                         | Lab strain             |
